# Supplementary material for: Assignment of the solid state spectra of the group VI hexacarbonyls by inelastic neutron scattering spectroscopy
Source: Royal Society of Chemistry journal article supplement (doi:10.1039/c9cp05191k), 2019-01-01
Supplement: c9cp05191k1.pdf [file c9cp05191k1.pdf]

## Electronic Supplementary Information

for:

# Assignment of the solid state spectra of the Group VI hexacarbonyls by inelastic neutron scattering spectroscopy

Stewart F. Parker<sup>\*1,a)</sup> and Upali A. Jayasooriya<sup>2)</sup>

<sup>1</sup>ISIS Facility, STFC Rutherford Appleton Laboratory, Chilton, Didcot, Oxon OX11 0QX, UK,

<sup>2</sup>School of Chemical Sciences, University of East Anglia, Norwich NR4 7TJ, UK.

| Table of contents                                                                                           | Page |
|-------------------------------------------------------------------------------------------------------------|------|
| <b>Figure S1:</b> Dispersion curves of Cr(CO) <sub>6</sub> in the C≡O stretch region.                       | 2    |
| <b>Figure S2:</b> Dispersion curves of Mo(CO) <sub>6</sub> in the C≡O stretch region.                       | 2    |
| <b>Figure S3:</b> Dispersion curves of Mo(CO) <sub>6</sub> in the M–C stretch and M–C≡O deformation region. | 3    |
| <b>Figure S4:</b> Dispersion curves of Mo(CO) <sub>6</sub> in the C–M–C bend and lattice mode region.       | 3    |
| <b>Figure S5:</b> Dispersion curves of W(CO) <sub>6</sub> in the C≡O stretch region.                        | 4    |
| <b>Figure S6:</b> Dispersion curves of W(CO) <sub>6</sub> in the M–C stretch and M–C≡O deformation region.  | 4    |
| <b>Figure S7:</b> Dispersion curves of W(CO) <sub>6</sub> in the C–M–C bend and lattice mode region.        | 5    |
| <b>Table S1:</b> CASTEP calculated transition energies for Cr(CO) <sub>6</sub> and assignments.             | 6    |
| <b>Table S2:</b> CASTEP calculated transition energies for Mo(CO) <sub>6</sub> and assignments.             | 8    |
| <b>Table S3:</b> CASTEP calculated transition energies for W(CO) <sub>6</sub> and assignments.              | 11   |

---

<sup>\*a)</sup> Author to whom correspondence should be addressed.

Electronic mail: [stewart.parker@stfc.ac.uk](mailto:stewart.parker@stfc.ac.uk)

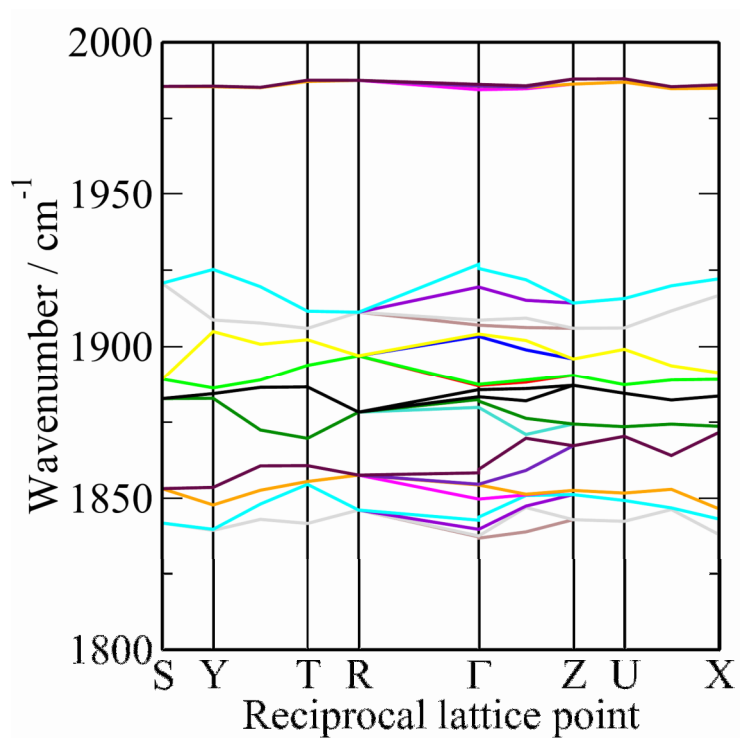

**Figure S1:** Dispersion curves of  $\text{Cr}(\text{CO})_6$  in the  $\text{C}\equiv\text{O}$  stretch region.

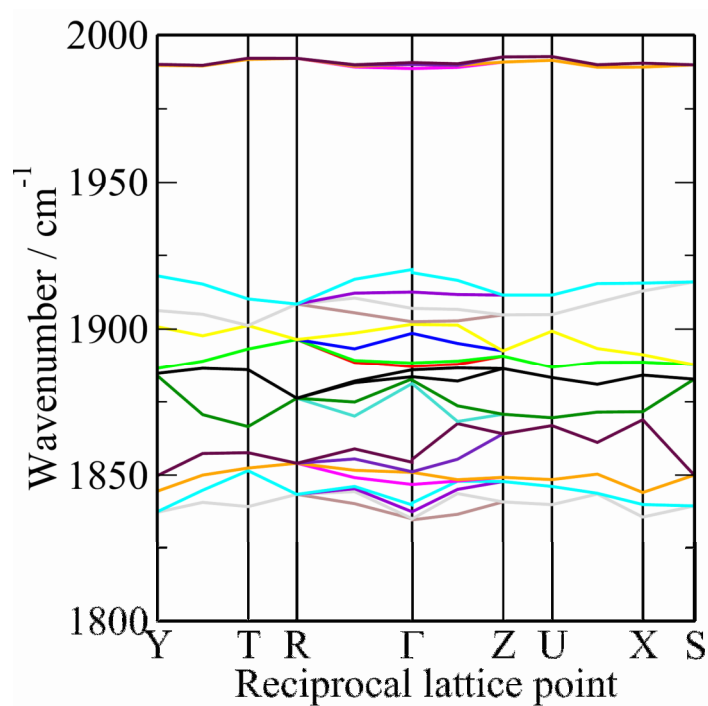

**Figure S2:** Dispersion curves of  $\text{Mo}(\text{CO})_6$  in the  $\text{C}\equiv\text{O}$  stretch region.

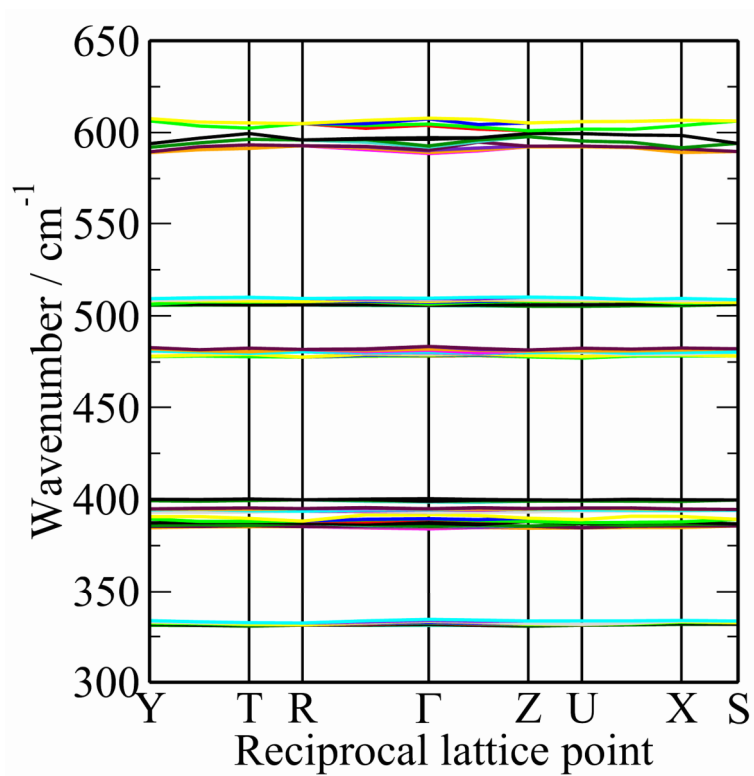

**Figure S3:** Dispersion curves of Mo(CO)<sub>6</sub> in the M-C stretch and M-C=O deformation region.

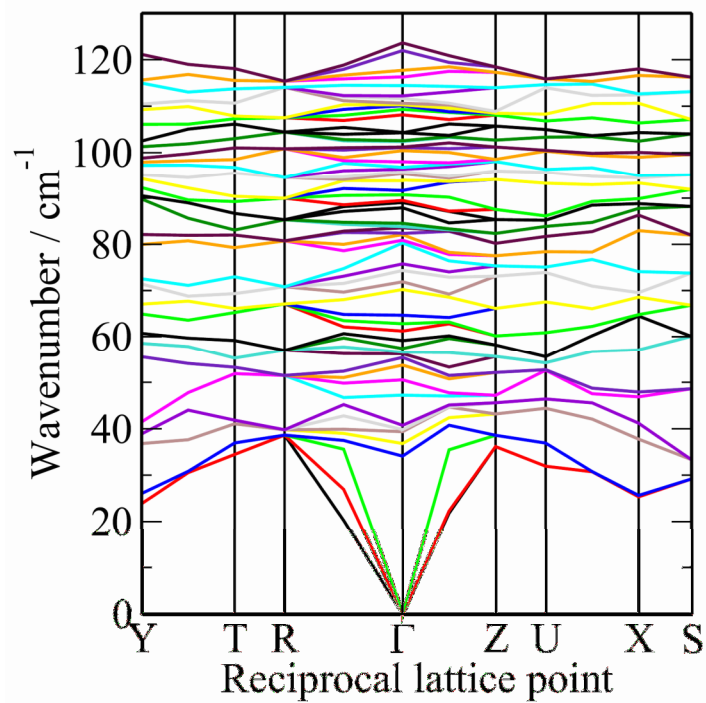

**Figure S4:** Dispersion curves of Mo(CO)<sub>6</sub> in the C-M-C bend and lattice mode region.

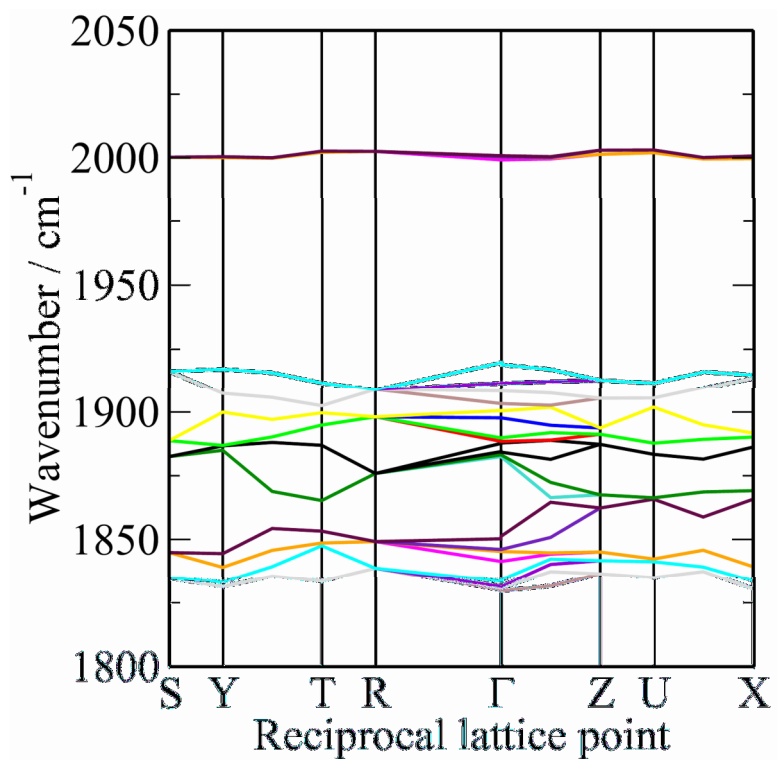

**Figure S5:** Dispersion curves of W(CO)<sub>6</sub> in the C=O stretch region.

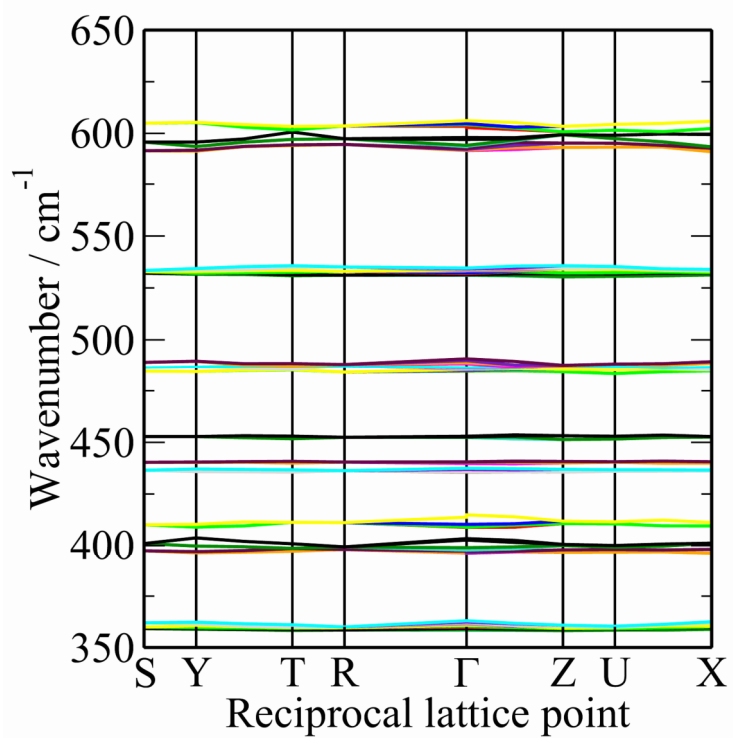

**Figure S6:** Dispersion curves of W(CO)<sub>6</sub> in the M-C stretch and M-C≡O deformation region.

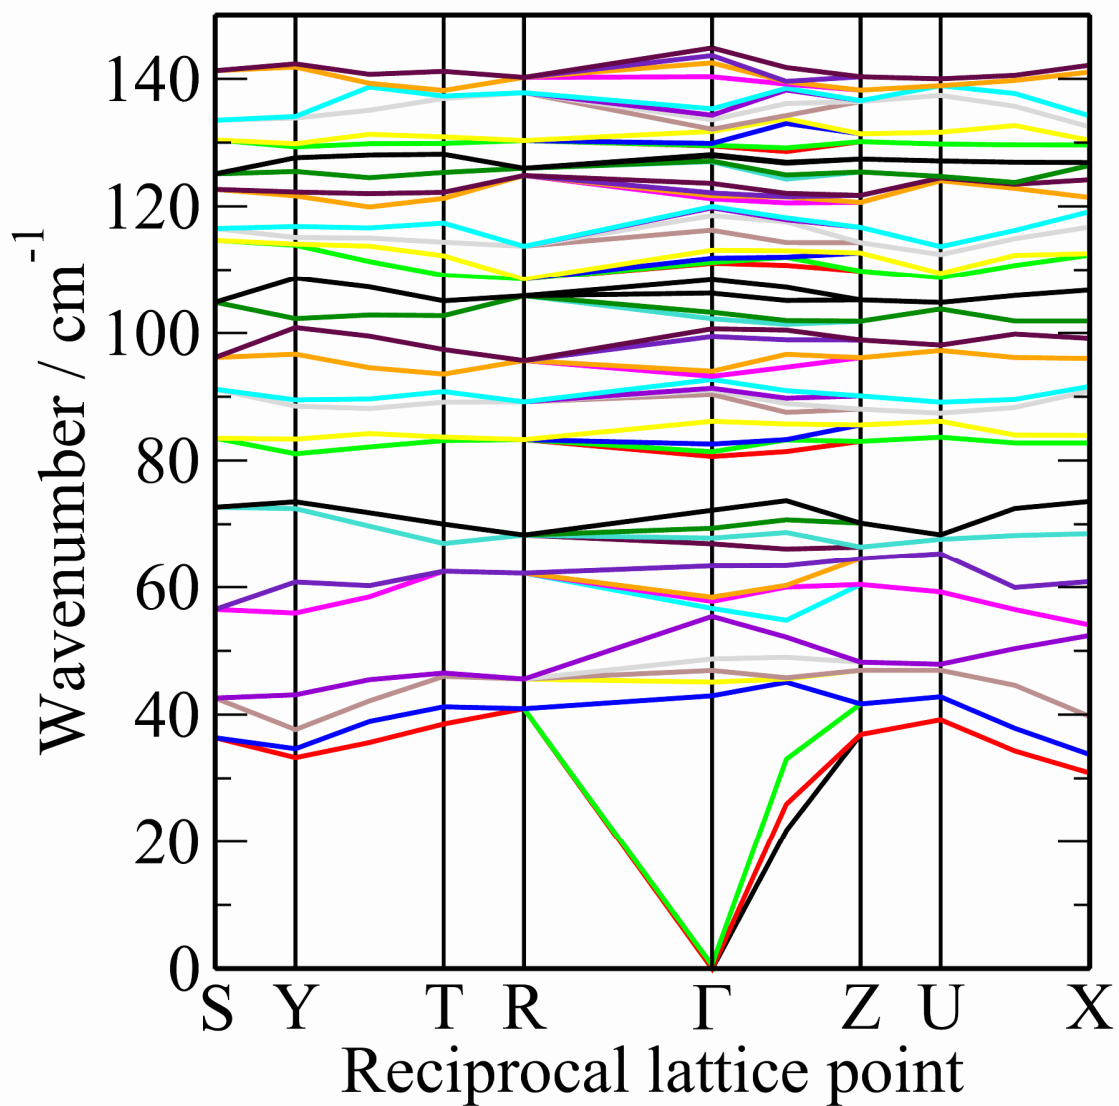

**Figure S7:** Dispersion curves of  $W(CO)_6$  in the C-M-C bend and lattice mode region.

Table S1: CASTEP calculated transition energies for Cr(CO)6 and assignments.

| Mode number | Transition energy (cm-1) | Infrared intensity ((D/A)**2/amu) | Raman intensity (A**4/amu) | Assignment   | Pnma symmetry | Oh symmetry |
|-------------|--------------------------|-----------------------------------|----------------------------|--------------|---------------|-------------|
| 1           | 0.00                     | 0.00                              | 0.00                       | Acoustic     | B1u           |             |
| 2           | 0.00                     | 0.00                              | 0.00                       | Acoustic     | B3u           |             |
| 3           | 0.00                     | 0.00                              | 0.00                       | Acoustic     | B2u           |             |
| 4           | 39.32                    | 0.00                              | 0.00                       | Translation  | Au            |             |
| 5           | 44.63                    | 0.01                              | 0.00                       | Libration    | B2u           |             |
| 6           | 44.91                    | 0.00                              | 0.88                       | Translation  | Ag            |             |
| 7           | 49.95                    | 0.00                              | 0.06                       | Translation  | B2g           |             |
| 8           | 52.03                    | 0.00                              | 0.00                       | Translation  | B3u           |             |
| 9           | 52.03                    | 0.00                              | 0.01                       | Translation  | B3g           |             |
| 10          | 54.76                    | 0.00                              | 0.21                       | Translation  | Ag            |             |
| 11          | 55.02                    | 0.00                              | 4.20                       | Libration    | B3g           |             |
| 12          | 56.84                    | 0.00                              | 0.00                       | Translation  | B1g           |             |
| 13          | 61.32                    | 0.00                              | 0.00                       | Libration    | Au            |             |
| 14          | 68.52                    | 0.00                              | 0.73                       | Libration    | B1g           |             |
| 15          | 69.08                    | 0.00                              | 0.00                       | Libration    | B1u           |             |
| 16          | 69.15                    | 0.00                              | 0.00                       | Libration    | Au            |             |
| 17          | 70.07                    | 0.00                              | 1.85                       | Libration    | B3g           |             |
| 18          | 70.80                    | 0.00                              | 5.56                       | Libration    | Ag            |             |
| 19          | 71.03                    | 0.00                              | 0.46                       | Translation  | B2g           |             |
| 20          | 75.74                    | 0.00                              | 0.00                       | Translation  | B1u           |             |
| 21          | 81.08                    | 0.03                              | 0.00                       | Libration    | B3u           |             |
| 22          | 81.23                    | 0.00                              | 0.18                       | Libration    | B1g           |             |
| 23          | 81.26                    | 0.00                              | 0.90                       | Libration    | B2g           |             |
| 24          | 81.53                    | 0.04                              | 0.00                       | Libration    | B2u           |             |
| 25          | 84.41                    | 0.00                              | 0.00                       | C-Cr-C bend  | Au            | T2u         |
| 26          | 86.40                    | 0.00                              | 0.00                       | C-Cr-C bend  | B1u           | T2u         |
| 27          | 88.71                    | 0.00                              | 0.00                       | C-Cr-C bend  | B3u           | T2u         |
| 28          | 88.79                    | 0.00                              | 2.76                       | C-Cr-C bend  | B1g           | T2u         |
| 29          | 91.71                    | 0.08                              | 0.00                       | C-Cr-C bend  | B2u           | T2u         |
| 30          | 93.17                    | 0.00                              | 0.90                       | C-Cr-C bend  | B2g           | T2u         |
| 31          | 93.96                    | 0.00                              | 85.10                      | C-Cr-C bend  | Ag            | T2u         |
| 32          | 95.19                    | 0.00                              | 9.84                       | C-Cr-C bend  | B1g           | T2u         |
| 33          | 95.37                    | 0.00                              | 6.20                       | C-Cr-C bend  | B3g           | T2u         |
| 34          | 98.01                    | 0.00                              | 0.00                       | C-Cr-C bend  | Au            | T2u         |
| 35          | 103.23                   | 0.09                              | 0.00                       | C-Cr-C bend  | B1u           | T1u         |
| 36          | 104.31                   | 0.00                              | 27.51                      | C-Cr-C bend  | Ag            | T1u         |
| 37          | 105.26                   | 0.00                              | 6.48                       | C-Cr-C bend  | B2g           | T2u         |
| 38          | 106.25                   | 0.00                              | 0.00                       | C-Cr-C bend  | B2u           | T2u         |
| 39          | 109.34                   | 0.00                              | 0.53                       | C-Cr-C bend  | B3g           | T1u         |
| 40          | 110.76                   | 0.02                              | 0.00                       | C-Cr-C bend  | B3u           | T1u         |
| 41          | 112.42                   | 0.00                              | 0.34                       | C-Cr-C bend  | B1g           | T1u         |
| 42          | 114.19                   | 0.01                              | 0.00                       | C-Cr-C bend  | B2u           | T1u         |
| 43          | 114.82                   | 0.00                              | 9.47                       | C-Cr-C bend  | B3g           | T1u         |
| 44          | 116.04                   | 0.00                              | 0.00                       | C-Cr-C bend  | Au            | T1u         |
| 45          | 116.57                   | 0.11                              | 0.00                       | C-Cr-C bend  | B1u           | T1u         |
| 46          | 116.97                   | 0.00                              | 37.67                      | C-Cr-C bend  | Ag            | T1u         |
| 47          | 117.65                   | 0.16                              | 0.00                       | C-Cr-C bend  | B3u           | T1u         |
| 48          | 118.42                   | 0.00                              | 0.59                       | C-Cr-C bend  | B2g           | T1u         |
| 49          | 119.52                   | 0.00                              | 0.00                       | C-Cr-C bend  | Au            | T2g         |
| 50          | 120.85                   | 0.00                              | 0.00                       | C-Cr-C bend  | B1u           | T2g         |
| 51          | 122.20                   | 0.00                              | 32.31                      | C-Cr-C bend  | B1g           | T2g         |
| 52          | 122.37                   | 0.09                              | 0.00                       | C-Cr-C bend  | B2u           | T2g         |
| 53          | 123.63                   | 0.04                              | 0.00                       | C-Cr-C bend  | B3u           | T2g         |
| 54          | 125.41                   | 0.00                              | 72.29                      | C-Cr-C bend  | B3g           | T2g         |
| 55          | 126.12                   | 0.00                              | 25.16                      | C-Cr-C bend  | B2g           | T2g         |
| 56          | 126.41                   | 0.00                              | 153.86                     | C-Cr-C bend  | Ag            | T2g         |
| 57          | 127.05                   | 0.03                              | 0.00                       | C-Cr-C bend  | B1u           | T2g         |
| 58          | 128.53                   | 0.00                              | 35.86                      | C-Cr-C bend  | B2g           | T2g         |
| 59          | 135.44                   | 0.02                              | 0.00                       | C-Cr-C bend  | B3u           | T2g         |
| 60          | 135.83                   | 0.00                              | 31.07                      | C-Cr-C bend  | Ag            | T2g         |
| 61          | 353.47                   | 0.00                              | 0.00                       | Cr-C≡O bend  | Au            | T1g         |
| 62          | 353.74                   | 0.02                              | 0.00                       | Cr-C≡O bend  | B2u           | T1g         |
| 63          | 354.12                   | 0.00                              | 0.06                       | Cr-C≡O bend  | B3g           | T1g         |
| 64          | 354.82                   | 0.00                              | 0.00                       | Cr-C≡O bend  | Au            | T1g         |
| 65          | 355.01                   | 0.00                              | 0.36                       | Cr-C≡O bend  | B1g           | T1g         |
| 66          | 355.03                   | 0.00                              | 0.00                       | Cr-C≡O bend  | B2u           | T1g         |
| 67          | 355.59                   | 0.00                              | 0.09                       | Cr-C≡O bend  | B1g           | T1g         |
| 68          | 355.96                   | 0.00                              | 0.05                       | Cr-C≡O bend  | B3g           | T1g         |
| 69          | 356.12                   | 0.00                              | 0.00                       | Cr-C≡O bend  | B3u           | T1g         |
| 70          | 356.76                   | 0.00                              | 0.92                       | Cr-C≡O bend  | Ag            | T1g         |
| 71          | 357.05                   | 0.00                              | 0.00                       | Cr-C≡O bend  | B1u           | T1g         |
| 72          | 357.73                   | 0.00                              | 0.01                       | Cr-C≡O bend  | B2g           | T1g         |
| 73          | 381.74                   | 0.00                              | 0.28                       | Cr-C stretch | B2g           | A1g         |
| 74          | 382.08                   | 0.00                              | 0.00                       | Cr-C stretch | B3u           | A1g         |
| 75          | 382.40                   | 0.00                              | 0.00                       | Cr-C stretch | B1u           | A1g         |
| 76          | 384.21                   | 0.00                              | 875.07                     | Cr-C stretch | Ag            | A1g         |
| 77          | 395.33                   | 0.04                              | 0.00                       | Cr-C stretch | B2u           | Eg          |
| 78          | 395.70                   | 0.00                              | 48.88                      | Cr-C stretch | B1g           | Eg          |
| 79          | 397.18                   | 0.00                              | 0.00                       | Cr-C stretch | Au            | Eg          |
| 80          | 397.23                   | 0.00                              | 15.52                      | Cr-C stretch | B3g           | Eg          |
| 81          | 398.07                   | 0.00                              | 42.86                      | Cr-C stretch | Ag            | Eg          |
| 82          | 398.42                   | 0.01                              | 0.00                       | Cr-C stretch | B3u           | Eg          |

|     |         |        |         |              |     |     |
|-----|---------|--------|---------|--------------|-----|-----|
| 83  | 399.08  | 0.01   | 0.00    | Cr-C stretch | B1u | Eg  |
| 84  | 399.40  | 0.00   | 32.31   | Cr-C stretch | B2g | Eg  |
| 85  | 453.18  | 0.00   | 0.00    | Cr-C≡O bend  | B1g | T1u |
| 86  | 453.52  | 0.00   | 0.00    | Cr-C≡O bend  | Au  | T1u |
| 87  | 454.31  | 0.00   | 3.24    | Cr-C≡O bend  | B3g | T1u |
| 88  | 454.41  | 0.00   | 1.32    | Cr-C≡O bend  | Ag  | T1u |
| 89  | 454.45  | 2.43   | 0.00    | Cr-C≡O bend  | B3u | T1u |
| 90  | 455.24  | 0.00   | 0.96    | Cr-C≡O bend  | B2g | T1u |
| 91  | 455.41  | 0.12   | 0.00    | Cr-C≡O bend  | B1u | T1u |
| 92  | 456.48  | 3.06   | 0.00    | Cr-C≡O bend  | B2u | T1u |
| 93  | 457.26  | 2.71   | 0.00    | Cr-C≡O bend  | B1u | T1u |
| 94  | 457.45  | 0.00   | 0.02    | Cr-C≡O bend  | B2g | T1u |
| 95  | 458.44  | 0.44   | 0.00    | Cr-C≡O bend  | B3u | T1u |
| 96  | 458.91  | 0.00   | 0.44    | Cr-C≡O bend  | Ag  | T1u |
| 97  | 514.32  | 0.00   | 0.00    | Cr-C≡O bend  | Au  | T2u |
| 98  | 514.50  | 0.00   | 0.00    | Cr-C≡O bend  | B2u | T2u |
| 99  | 514.77  | 0.00   | 0.01    | Cr-C≡O bend  | B3g | T2u |
| 100 | 515.08  | 0.04   | 0.00    | Cr-C≡O bend  | B1u | T2u |
| 101 | 515.18  | 0.00   | 0.02    | Cr-C≡O bend  | B1g | T2u |
| 102 | 515.37  | 0.00   | 0.84    | Cr-C≡O bend  | B2g | T2u |
| 103 | 515.64  | 0.00   | 0.00    | Cr-C≡O bend  | Au  | T2u |
| 104 | 516.56  | 0.00   | 0.00    | Cr-C≡O bend  | B3u | T2u |
| 105 | 516.67  | 0.00   | 0.00    | Cr-C≡O bend  | B1g | T2u |
| 106 | 517.01  | 0.00   | 1.34    | Cr-C≡O bend  | Ag  | T2u |
| 107 | 517.12  | 0.00   | 0.01    | Cr-C≡O bend  | B3g | T2u |
| 108 | 517.63  | 0.05   | 0.00    | Cr-C≡O bend  | B2u | T2u |
| 109 | 535.64  | 0.01   | 0.00    | Cr-C≡O bend  | B2u | T2g |
| 110 | 535.65  | 0.00   | 15.03   | Cr-C≡O bend  | B1g | T2g |
| 111 | 535.87  | 0.00   | 0.00    | Cr-C≡O bend  | Au  | T2g |
| 112 | 536.57  | 0.00   | 11.15   | Cr-C≡O bend  | B3g | T2g |
| 113 | 536.89  | 0.02   | 0.00    | Cr-C≡O bend  | B1u | T2g |
| 114 | 538.33  | 0.00   | 6.15    | Cr-C≡O bend  | B2g | T2g |
| 115 | 538.39  | 0.00   | 0.00    | Cr-C≡O bend  | B3u | T2g |
| 116 | 539.09  | 0.00   | 28.53   | Cr-C≡O bend  | Ag  | T2g |
| 117 | 540.57  | 0.00   | 19.89   | Cr-C≡O bend  | Ag  | T2g |
| 118 | 540.87  | 0.00   | 0.00    | Cr-C≡O bend  | B1u | T2g |
| 119 | 541.93  | 0.00   | 0.18    | Cr-C≡O bend  | B2g | T2g |
| 120 | 542.96  | 0.01   | 0.00    | Cr-C≡O bend  | B3u | T2g |
| 121 | 665.12  | 0.00   | 0.19    | Cr-C stretch | Ag  | T1u |
| 122 | 665.43  | 28.42  | 0.00    | Cr-C stretch | B3u | T1u |
| 123 | 665.80  | 39.60  | 0.00    | Cr-C stretch | B1u | T1u |
| 124 | 665.84  | 40.30  | 0.00    | Cr-C stretch | B2u | T1u |
| 125 | 666.71  | 0.00   | 0.93    | Cr-C stretch | B2g | T1u |
| 126 | 671.90  | 0.00   | 0.14    | Cr-C stretch | Ag  | T1u |
| 127 | 672.01  | 10.72  | 0.00    | Cr-C stretch | B3u | T1u |
| 128 | 674.07  | 0.00   | 0.00    | Cr-C stretch | Au  | T1u |
| 129 | 674.90  | 0.00   | 2.92    | Cr-C stretch | B3g | T1u |
| 130 | 689.07  | 0.13   | 0.00    | Cr-C stretch | B1u | T1u |
| 131 | 689.11  | 0.00   | 1.78    | Cr-C stretch | B2g | T1u |
| 132 | 691.65  | 0.00   | 0.00    | Cr-C stretch | B1g | T1u |
| 133 | 1836.74 | 236.08 | 0.00    | C≡O stretch  | B3u | Eg  |
| 134 | 1837.92 | 0.00   | 9.46    | C≡O stretch  | Ag  | Eg  |
| 135 | 1839.30 | 0.00   | 5.02    | C≡O stretch  | B2g | Eg  |
| 136 | 1839.54 | 311.91 | 0.00    | C≡O stretch  | B1u | Eg  |
| 137 | 1842.44 | 320.55 | 0.00    | C≡O stretch  | B2u | Eg  |
| 138 | 1848.65 | 0.00   | 0.00    | C≡O stretch  | Au  | Eg  |
| 139 | 1853.10 | 0.00   | 260.25  | C≡O stretch  | B3g | Eg  |
| 140 | 1853.38 | 0.00   | 41.85   | C≡O stretch  | Ag  | T1u |
| 141 | 1857.64 | 74.58  | 0.00    | C≡O stretch  | B3u | T1u |
| 142 | 1877.85 | 0.00   | 2273.75 | C≡O stretch  | Ag  | T1u |
| 143 | 1881.13 | 0.00   | 3917.14 | C≡O stretch  | B1g | Eg  |
| 144 | 1881.35 | 2.75   | 0.00    | C≡O stretch  | B1u | T1u |
| 145 | 1884.04 | 2.73   | 0.00    | C≡O stretch  | B2u | T1u |
| 146 | 1884.11 | 0.00   | 3082.26 | C≡O stretch  | B2g | T1u |
| 147 | 1885.19 | 0.80   | 0.00    | C≡O stretch  | B3u | T1u |
| 148 | 1900.00 | 0.00   | 1310.79 | C≡O stretch  | B3g | T1u |
| 149 | 1901.25 | 0.00   | 67.20   | C≡O stretch  | B2g | T1u |
| 150 | 1903.17 | 0.04   | 0.00    | C≡O stretch  | B1u | T1u |
| 151 | 1904.86 | 0.00   | 0.00    | C≡O stretch  | Au  | T1u |
| 152 | 1915.44 | 0.00   | 54.62   | C≡O stretch  | B1g | T1u |
| 153 | 1980.73 | 0.00   | 2310.86 | C≡O stretch  | Ag  | A1g |
| 154 | 1981.68 | 0.08   | 0.00    | C≡O stretch  | B1u | A1g |
| 155 | 1981.73 | 0.00   | 7.11    | C≡O stretch  | B2g | A1g |
| 156 | 1982.17 | 0.04   | 0.00    | C≡O stretch  | B3u | A1g |

Table S2: CASTEP calculated transition energies for Mo(CO)6 and assignments.

| Mode number | Transition energy (cm-1) | Infrared intensity ((D/A)**2/amu) | Raman active? | Assignment  | Pnma symmetry | Oh symmetry |
|-------------|--------------------------|-----------------------------------|---------------|-------------|---------------|-------------|
| 1           | 0.00                     | 0.00                              | N             | Acoustic    | B2u           |             |
| 2           | 0.00                     | 0.00                              | N             | Acoustic    | B1u           |             |
| 3           | 0.00                     | 0.00                              | N             | Acoustic    | B3u           |             |
| 4           | 34.11                    | 0.00                              | Y             | Translation | Ag            |             |
| 5           | 36.82                    | 0.00                              | Y             | Translation | Ag            |             |
| 6           | 39.36                    | 0.00                              | Y             | Translation | B2g           |             |
| 7           | 39.81                    | 0.01                              | N             | Translation | B3u           |             |
| 8           | 40.74                    | 0.00                              | Y             | Translation | B3g           |             |
| 9           | 47.22                    | 0.01                              | N             | Libration   | B2u           |             |
| 10          | 50.53                    | 0.00                              | N             | Translation | Au            |             |
| 11          | 53.71                    | 0.00                              | N             | Libration   | Au            |             |
| 12          | 55.38                    | 0.00                              | Y             | Translation | B2g           |             |
| 13          | 56.21                    | 0.00                              | Y             | Libration   | B3g           |             |
| 14          | 56.57                    | 0.00                              | Y             | Translation | B1g           |             |
| 15          | 57.38                    | 0.00                              | N             | Translation | B1u           |             |
| 16          | 59.13                    | 0.00                              | Y             | Libration   | Ag            |             |
| 17          | 61.21                    | 0.00                              | N             | Libration   | Au            |             |
| 18          | 62.81                    | 0.00                              | N             | Libration   | B1u           |             |
| 19          | 64.65                    | 0.00                              | Y             | Libration   | B1g           |             |
| 20          | 70.20                    | 0.02                              | N             | Libration   | B3u           |             |
| 21          | 71.89                    | 0.00                              | Y             | C-Mo-C bend | B2g           | T2u         |
| 22          | 74.34                    | 0.00                              | Y             | C-Mo-C bend | B1g           | T2u         |
| 23          | 75.77                    | 0.00                              | Y             | C-Mo-C bend | B3g           | T2u         |
| 24          | 80.29                    | 0.00                              | N             | C-Mo-C bend | Au            | T2u         |
| 25          | 80.88                    | 0.00                              | N             | Libration   | B2u           |             |
| 26          | 82.09                    | 0.00                              | Y             | Libration   | B3g           |             |
| 27          | 82.36                    | 0.06                              | N             | C-Mo-C bend | B2u           | T2u         |
| 28          | 83.56                    | 0.00                              | N             | C-Mo-C bend | B3u           | T2u         |
| 29          | 83.82                    | 0.00                              | Y             | Libration   | B1g           |             |
| 30          | 84.55                    | 0.00                              | Y             | C-Mo-C bend | Ag            | T2u         |
| 31          | 87.90                    | 0.00                              | Y             | C-Mo-C bend | B1g           | T2u         |
| 32          | 89.05                    | 0.00                              | Y             | Libration   | B2g           |             |
| 33          | 89.50                    | 0.01                              | N             | C-Mo-C bend | B2u           | T2u         |
| 34          | 90.65                    | 0.03                              | N             | C-Mo-C bend | B1u           | T2u         |
| 35          | 91.68                    | 0.00                              | N             | C-Mo-C bend | Au            | T2u         |
| 36          | 93.58                    | 0.09                              | N             | C-Mo-C bend | B1u           | T1u         |
| 37          | 95.30                    | 0.03                              | N             | C-Mo-C bend | B3u           | T1u         |
| 38          | 95.83                    | 0.00                              | Y             | C-Mo-C bend | B1g           | T1u         |
| 39          | 96.38                    | 0.01                              | N             | C-Mo-C bend | B1u           | T1u         |
| 40          | 96.80                    | 0.00                              | Y             | C-Mo-C bend | B2g           | T1u         |
| 41          | 98.00                    | 0.00                              | N             | C-Mo-C bend | Au            | T1u         |
| 42          | 100.43                   | 0.00                              | N             | C-Mo-C bend | B2u           | T1u         |
| 43          | 101.09                   | 0.00                              | Y             | C-Mo-C bend | Ag            | T1u         |
| 44          | 101.20                   | 0.00                              | Y             | C-Mo-C bend | B3g           | T2u         |
| 45          | 102.40                   | 0.00                              | Y             | C-Mo-C bend | Ag            | T1u         |
| 46          | 102.58                   | 0.00                              | Y             | C-Mo-C bend | B2g           | T1u         |
| 47          | 104.28                   | 0.00                              | Y             | C-Mo-C bend | B3g           | T1u         |
| 48          | 104.29                   | 0.11                              | N             | C-Mo-C bend | B3u           | T1u         |
| 49          | 108.12                   | 0.01                              | N             | C-Mo-C bend | B1u           | T2g         |
| 50          | 109.31                   | 0.01                              | N             | C-Mo-C bend | B3u           | T2g         |
| 51          | 110.11                   | 0.00                              | Y             | C-Mo-C bend | Ag            | T2g         |
| 52          | 110.31                   | 0.00                              | Y             | C-Mo-C bend | B3g           | T2g         |
| 53          | 110.63                   | 0.00                              | Y             | C-Mo-C bend | B2g           | T2g         |
| 54          | 111.65                   | 0.00                              | N             | C-Mo-C bend | Au            | T2g         |
| 55          | 112.22                   | 0.00                              | Y             | C-Mo-C bend | B1g           | T2g         |
| 56          | 114.39                   | 0.02                              | N             | C-Mo-C bend | B1u           | T2g         |
| 57          | 116.25                   | 0.08                              | N             | C-Mo-C bend | B2u           | T2g         |
| 58          | 117.72                   | 0.00                              | Y             | C-Mo-C bend | B2g           | T2g         |
| 59          | 121.97                   | 0.00                              | Y             | C-Mo-C bend | Ag            | T2g         |
| 60          | 123.60                   | 0.00                              | N             | C-Mo-C bend | B3u           | T2g         |
| 61          | 331.11                   | 0.00                              | N             | Mo-C≡O bend | Au            | T1g         |
| 62          | 331.56                   | 0.00                              | Y             | Mo-C≡O bend | B3g           | T1g         |
| 63          | 331.74                   | 0.01                              | N             | Mo-C≡O bend | B2u           | T1g         |
| 64          | 332.23                   | 0.00                              | N             | Mo-C≡O bend | Au            | T1g         |
| 65          | 332.34                   | 0.02                              | N             | Mo-C≡O bend | B2u           | T1g         |
| 66          | 332.41                   | 0.00                              | N             | Mo-C≡O bend | B3u           | T1g         |
| 67          | 332.65                   | 0.00                              | Y             | Mo-C≡O bend | B1g           | T1g         |
| 68          | 333.27                   | 0.00                              | Y             | Mo-C≡O bend | Ag            | T1g         |
| 69          | 333.45                   | 0.00                              | Y             | Mo-C≡O bend | B1g           | T1g         |
| 70          | 333.70                   | 0.00                              | N             | Mo-C≡O bend | B1u           | T1g         |



|     |         |        |   |              |     |     |
|-----|---------|--------|---|--------------|-----|-----|
| 71  | 333.94  | 0.00   | Y | Mo-C≡O bend  | B3g | T1g |
| 72  | 334.40  | 0.00   | Y | Mo-C≡O bend  | B2g | T1g |
| 73  | 384.11  | 0.00   | N | Mo-C≡O bend  | Au  | T1u |
| 74  | 384.96  | 6.48   | N | Mo-C≡O bend  | B3u | T1u |
| 75  | 385.20  | 0.00   | Y | Mo-C≡O bend  | Ag  | T1u |
| 76  | 385.42  | 0.00   | Y | Mo-C≡O bend  | B2g | T1u |
| 77  | 385.59  | 0.00   | Y | Mo-C≡O bend  | B3g | T1u |
| 78  | 385.60  | 6.90   | N | Mo-C≡O bend  | B2u | T1u |
| 79  | 385.78  | 6.75   | N | Mo-C≡O bend  | B1u | T1u |
| 80  | 387.11  | 0.00   | Y | Mo-C≡O bend  | Ag  | T1u |
| 81  | 387.54  | 0.12   | N | Mo-C≡O bend  | B3u | T1u |
| 82  | 389.30  | 0.03   | N | Mo-C≡O bend  | B1u | T1u |
| 83  | 389.48  | 0.00   | Y | Mo-C≡O bend  | B1g | T1u |
| 84  | 389.62  | 0.00   | Y | Mo-C≡O bend  | B2g | T1u |
| 85  | 393.05  | 0.17   | N | Mo-C stretch | B2u | Eg  |
| 86  | 393.06  | 0.00   | Y | Mo-C stretch | B1g | Eg  |
| 87  | 394.36  | 0.00   | Y | Mo-C stretch | Ag  | Eg  |
| 88  | 394.44  | 0.20   | N | Mo-C stretch | B3u | Eg  |
| 89  | 394.79  | 0.00   | Y | Mo-C stretch | B3g | Eg  |
| 90  | 394.80  | 0.00   | N | Mo-C stretch | Au  | Eg  |
| 91  | 394.87  | 0.05   | N | Mo-C stretch | B1u | Eg  |
| 92  | 394.93  | 0.00   | Y | Mo-C stretch | B2g | Eg  |
| 93  | 398.62  | 0.00   | Y | Mo-C stretch | B2g | A1g |
| 94  | 399.04  | 0.01   | N | Mo-C stretch | B1u | A1g |
| 95  | 399.07  | 0.00   | N | Mo-C stretch | B3u | A1g |
| 96  | 400.48  | 0.00   | Y | Mo-C stretch | Ag  | A1g |
| 97  | 478.28  | 0.00   | Y | Mo-C≡O bend  | B1g | T2g |
| 98  | 478.47  | 0.01   | N | Mo-C≡O bend  | B2u | T2g |
| 99  | 478.77  | 0.02   | N | Mo-C≡O bend  | B1u | T2g |
| 100 | 478.86  | 0.00   | N | Mo-C≡O bend  | Au  | T2g |
| 101 | 479.31  | 0.00   | Y | Mo-C≡O bend  | B3g | T2g |
| 102 | 479.45  | 0.00   | Y | Mo-C≡O bend  | B2g | T2g |
| 103 | 480.05  | 0.00   | N | Mo-C≡O bend  | B3u | T2g |
| 104 | 480.33  | 0.00   | Y | Mo-C≡O bend  | Ag  | T2g |
| 105 | 481.33  | 0.00   | Y | Mo-C≡O bend  | Ag  | T2g |
| 106 | 482.01  | 0.00   | N | Mo-C≡O bend  | B1u | T2g |
| 107 | 483.38  | 0.00   | N | Mo-C≡O bend  | B3u | T2g |
| 108 | 483.47  | 0.00   | Y | Mo-C≡O bend  | B2g | T2g |
| 109 | 505.50  | 0.00   | N | Mo-C≡O bend  | Au  | T2u |
| 110 | 505.65  | 0.03   | N | Mo-C≡O bend  | B1u | T2u |
| 111 | 505.77  | 0.00   | Y | Mo-C≡O bend  | B3g | T2u |
| 112 | 505.87  | 0.01   | N | Mo-C≡O bend  | B2u | T2u |
| 113 | 506.22  | 0.00   | Y | Mo-C≡O bend  | B1g | T2u |
| 114 | 506.36  | 0.00   | Y | Mo-C≡O bend  | B2g | T2u |
| 115 | 507.40  | 0.00   | N | Mo-C≡O bend  | Au  | T2u |
| 116 | 507.79  | 0.00   | N | Mo-C≡O bend  | B3u | T2u |
| 117 | 508.60  | 0.00   | Y | Mo-C≡O bend  | Ag  | T2u |
| 118 | 508.97  | 0.00   | Y | Mo-C≡O bend  | B1g | T2u |
| 119 | 509.36  | 0.10   | N | Mo-C≡O bend  | B2u | T2u |
| 120 | 509.53  | 0.00   | Y | Mo-C≡O bend  | B3g | T2u |
| 121 | 588.55  | 20.82  | N | Mo-C stretch | B3u | T1u |
| 122 | 589.13  | 26.46  | N | Mo-C stretch | B1u | T1u |
| 123 | 589.16  | 0.00   | Y | Mo-C stretch | Ag  | T1u |
| 124 | 590.37  | 26.86  | N | Mo-C stretch | B2u | T1u |
| 125 | 590.49  | 0.00   | Y | Mo-C stretch | B2g | T1u |
| 126 | 592.05  | 0.00   | Y | Mo-C stretch | Ag  | T1u |
| 127 | 592.80  | 5.69   | N | Mo-C stretch | B3u | T1u |
| 128 | 596.32  | 0.00   | N | Mo-C stretch | Au  | T1u |
| 129 | 597.22  | 0.00   | Y | Mo-C stretch | B3g | T1u |
| 130 | 604.62  | 0.00   | Y | Mo-C stretch | B2g | T1u |
| 131 | 604.62  | 0.27   | N | Mo-C stretch | B1u | T1u |
| 132 | 607.43  | 0.00   | Y | Mo-C stretch | B1g | T1u |
| 133 | 1834.74 | 255.29 | N | C≡O stretch  | B3u | Eg  |
| 134 | 1835.10 | 0.00   | Y | C≡O stretch  | Ag  | Eg  |
| 135 | 1837.51 | 0.00   | Y | C≡O stretch  | B2g | Eg  |
| 136 | 1837.65 | 345.91 | N | C≡O stretch  | B1u | Eg  |
| 137 | 1840.51 | 357.65 | N | C≡O stretch  | B2u | Eg  |
| 138 | 1846.79 | 0.00   | N | C≡O stretch  | Au  | Eg  |
| 139 | 1850.93 | 0.00   | Y | C≡O stretch  | Ag  | T1u |
| 140 | 1851.13 | 0.00   | Y | C≡O stretch  | B3g | Eg  |
| 141 | 1855.37 | 90.07  | N | C≡O stretch  | B3u | T1u |
| 142 | 1881.21 | 0.00   | Y | C≡O stretch  | Ag  | T1u |
| 143 | 1883.44 | 3.69   | N | C≡O stretch  | B1u | T1u |
| 144 | 1883.55 | 0.00   | Y | C≡O stretch  | B1g | Eg  |

|     |         |      |   |             |     |     |
|-----|---------|------|---|-------------|-----|-----|
| 145 | 1885.92 | 0.00 | Y | C≡O stretch | B2g | T1u |
| 146 | 1887.19 | 1.35 | N | C≡O stretch | B2u | T1u |
| 147 | 1888.45 | 0.30 | N | C≡O stretch | B3u | T1u |
| 148 | 1898.57 | 0.00 | Y | C≡O stretch | B2g | T1u |
| 149 | 1901.68 | 0.11 | N | C≡O stretch | B1u | T1u |
| 150 | 1902.49 | 0.00 | Y | C≡O stretch | B3g | T1u |
| 151 | 1907.04 | 0.00 | N | C≡O stretch | Au  | T1u |
| 152 | 1912.58 | 0.00 | Y | C≡O stretch | B1g | T1u |
| 153 | 1988.63 | 0.00 | Y | C≡O stretch | Ag  | A1g |
| 154 | 1990.00 | 0.00 | Y | C≡O stretch | B2g | A1g |
| 155 | 1990.01 | 0.08 | N | C≡O stretch | B1u | A1g |
| 156 | 1990.66 | 0.01 | N | C≡O stretch | B3u | A1g |

**Table S3: CASTEP calculated transition energies for W(CO)6 and assignments.**

| Mode number | Transition energy (cm-1) | Infrared intensity ((D/A)**2/amu) | Raman active? | Assignment  | Pnma symmetry | Oh symmetry |
|-------------|--------------------------|-----------------------------------|---------------|-------------|---------------|-------------|
| 1           | 0.00                     | 0.00                              | N             | Acoustic    | B1u           |             |
| 2           | 0.00                     | 0.00                              | N             | Acoustic    | B3u           |             |
| 3           | 0.00                     | 0.00                              | N             | Acoustic    | B2u           |             |
| 4           | 42.95                    | 0.00                              | Y             | Translation | Ag            |             |
| 5           | 45.10                    | 0.00                              | Y             | Translation | B3g           |             |
| 6           | 46.92                    | 0.00                              | Y             | Translation | B2g           |             |
| 7           | 48.74                    | 0.00                              | N             | Translation | Au            |             |
| 8           | 55.40                    | 0.00                              | Y             | Translation | B1g           |             |
| 9           | 56.64                    | 0.00                              | Y             | Translation | Ag            |             |
| 10          | 57.74                    | 0.00                              | N             | Translation | B3u           |             |
| 11          | 58.34                    | 0.01                              | N             | Translation | B1u           |             |
| 12          | 63.35                    | 0.00                              | Y             | Translation | B2g           |             |
| 13          | 66.91                    | 0.00                              | N             | Libration   | Au            |             |
| 14          | 67.83                    | 0.00                              | N             | Libration   | B2u           |             |
| 15          | 69.38                    | 0.00                              | Y             | Libration   | B1g           |             |
| 16          | 72.19                    | 0.00                              | Y             | Libration   | B3g           |             |
| 17          | 80.63                    | 0.00                              | Y             | Libration   | Ag            |             |
| 18          | 81.36                    | 0.00                              | N             | Libration   | B1u           |             |
| 19          | 82.58                    | 0.00                              | N             | Libration   | Au            |             |
| 20          | 86.14                    | 0.00                              | Y             | C-W-C bend  | B1g           | T2u         |
| 21          | 90.35                    | 0.00                              | N             | Libration   | B2u           |             |
| 22          | 91.02                    | 0.01                              | N             | Libration   | B3u           |             |
| 23          | 91.34                    | 0.00                              | Y             | Libration   | B3g           |             |
| 24          | 92.69                    | 0.00                              | Y             | C-W-C bend  | B2g           | T2u         |
| 25          | 93.20                    | 0.01                              | N             | C-W-C bend  | B3u           | T2u         |
| 26          | 94.00                    | 0.00                              | Y             | C-W-C bend  | Ag            | T2u         |
| 27          | 99.46                    | 0.00                              | N             | C-W-C bend  | Au            | T2u         |
| 28          | 100.66                   | 0.00                              | Y             | Libration   | B2g           |             |
| 29          | 102.22                   | 0.00                              | Y             | C-W-C bend  | B3g           | T2u         |
| 30          | 103.18                   | 0.02                              | N             | C-W-C bend  | B1u           | T2u         |
| 31          | 106.25                   | 0.04                              | N             | C-W-C bend  | B2u           | T2u         |
| 32          | 108.39                   | 0.00                              | Y             | Libration   | B1g           |             |
| 33          | 111.04                   | 0.01                              | N             | C-W-C bend  | B1u           | T1u         |
| 34          | 111.21                   | 0.00                              | Y             | C-W-C bend  | B1g           | T2u         |
| 35          | 111.84                   | 0.00                              | N             | C-W-C bend  | Au            | T2u         |
| 36          | 113.13                   | 0.01                              | N             | C-W-C bend  | B3u           | T1u         |
| 37          | 116.25                   | 0.02                              | N             | C-W-C bend  | B2u           | T2u         |
| 38          | 118.55                   | 0.00                              | Y             | C-W-C bend  | B2g           | T1u         |
| 39          | 119.77                   | 0.00                              | Y             | C-W-C bend  | B3g           | T2u         |
| 40          | 119.98                   | 0.00                              | Y             | C-W-C bend  | Ag            | T1u         |
| 41          | 121.16                   | 0.00                              | N             | C-W-C bend  | B1u           | T1u         |
| 42          | 121.68                   | 0.00                              | Y             | C-W-C bend  | B2g           | T1u         |
| 43          | 122.11                   | 0.03                              | N             | C-W-C bend  | B2u           | T1u         |
| 44          | 123.61                   | 0.00                              | N             | C-W-C bend  | Au            | T1u         |
| 45          | 126.97                   | 0.10                              | N             | C-W-C bend  | B3u           | T1u         |
| 46          | 127.11                   | 0.00                              | Y             | C-W-C bend  | Ag            | T1u         |
| 47          | 127.95                   | 0.00                              | Y             | C-W-C bend  | B1g           | T1u         |
| 48          | 128.13                   | 0.00                              | Y             | C-W-C bend  | B3g           | T1u         |
| 49          | 129.46                   | 0.04                              | N             | C-W-C bend  | B1u           | T2g         |
| 50          | 129.49                   | 0.00                              | N             | C-W-C bend  | B3u           | T2g         |
| 51          | 129.87                   | 0.00                              | Y             | C-W-C bend  | B1g           | T2g         |
| 52          | 131.75                   | 0.00                              | Y             | C-W-C bend  | B2g           | T2g         |
| 53          | 132.10                   | 0.01                              | N             | C-W-C bend  | B2u           | T2g         |
| 54          | 133.57                   | 0.00                              | Y             | C-W-C bend  | B3g           | T2g         |
| 55          | 134.29                   | 0.00                              | N             | C-W-C bend  | Au            | T2g         |
| 56          | 135.30                   | 0.00                              | Y             | C-W-C bend  | Ag            | T2g         |
| 57          | 140.32                   | 0.00                              | N             | C-W-C bend  | B1u           | T2g         |
| 58          | 142.49                   | 0.00                              | Y             | C-W-C bend  | Ag            | T2g         |
| 59          | 143.65                   | 0.00                              | Y             | C-W-C bend  | B2g           | T2g         |
| 60          | 144.85                   | 0.01                              | N             | C-W-C bend  | B3u           | T2g         |
| 61          | 358.42                   | 0.00                              | N             | W-C=O bend  | B2u           | T1g         |
| 62          | 358.63                   | 0.00                              | N             | W-C=O bend  | Au            | T1g         |
| 63          | 359.31                   | 0.00                              | N             | W-C=O bend  | Au            | T1g         |
| 64          | 359.44                   | 0.00                              | Y             | W-C=O bend  | B3g           | T1g         |
| 65          | 359.89                   | 0.00                              | Y             | W-C=O bend  | B1g           | T1g         |
| 66          | 360.23                   | 0.22                              | N             | W-C=O bend  | B2u           | T1g         |
| 67          | 360.57                   | 0.00                              | Y             | W-C=O bend  | B3g           | T1g         |
| 68          | 360.76                   | 0.00                              | Y             | W-C=O bend  | B1g           | T1g         |
| 69          | 361.39                   | 0.01                              | N             | W-C=O bend  | B3u           | T1g         |
| 70          | 362.09                   | 0.00                              | Y             | W-C=O bend  | Ag            | T1g         |
| 71          | 362.38                   | 0.03                              | N             | W-C=O bend  | B1u           | T1g         |
| 72          | 362.98                   | 0.00                              | Y             | W-C=O bend  | B2g           | T1g         |
| 73          | 396.31                   | 8.84                              | N             | W-C=O bend  | B2u           | T1u         |

|     |         |        |   |             |     |     |
|-----|---------|--------|---|-------------|-----|-----|
| 74  | 396.45  | 0.00   | N | W-C≡O bend  | Au  | T1u |
| 75  | 396.50  | 6.95   | N | W-C≡O bend  | B3u | T1u |
| 76  | 397.23  | 0.00   | Y | W-C≡O bend  | Ag  | T1u |
| 77  | 397.86  | 0.00   | Y | W-C≡O bend  | B3g | T1u |
| 78  | 399.01  | 0.00   | Y | W-C≡O bend  | B2g | T1u |
| 79  | 399.46  | 5.22   | N | W-C≡O bend  | B1u | T1u |
| 80  | 403.39  | 0.00   | Y | W-C≡O bend  | B1g | T1u |
| 81  | 408.85  | 0.00   | Y | W-C≡O bend  | Ag  | T1u |
| 82  | 408.97  | 1.86   | N | W-C≡O bend  | B3u | T1u |
| 83  | 410.29  | 0.00   | Y | W-C≡O bend  | B2g | T1u |
| 84  | 410.33  | 3.77   | N | W-C≡O bend  | B1u | T1u |
| 85  | 435.55  | 0.08   | N | W-C stretch | B2u | Eg  |
| 86  | 435.83  | 0.00   | Y | W-C stretch | B1g | Eg  |
| 87  | 436.86  | 0.00   | Y | W-C stretch | B3g | Eg  |
| 88  | 437.43  | 0.00   | N | W-C stretch | Au  | Eg  |
| 89  | 439.75  | 0.01   | N | W-C stretch | B3u | Eg  |
| 90  | 440.32  | 0.00   | Y | W-C stretch | B2g | Eg  |
| 91  | 440.38  | 0.03   | N | W-C stretch | B1u | Eg  |
| 92  | 440.53  | 0.00   | Y | W-C stretch | Ag  | Eg  |
| 93  | 452.42  | 0.00   | N | W-C stretch | B3u | A1g |
| 94  | 452.48  | 0.00   | Y | W-C stretch | B2g | A1g |
| 95  | 452.63  | 0.00   | N | W-C stretch | B1u | A1g |
| 96  | 452.93  | 0.00   | Y | W-C stretch | Ag  | A1g |
| 97  | 484.49  | 0.03   | N | W-C≡O bend  | B1u | T2g |
| 98  | 484.59  | 0.00   | Y | W-C≡O bend  | B1g | T2g |
| 99  | 484.85  | 0.00   | N | W-C≡O bend  | B2u | T2g |
| 100 | 485.25  | 0.00   | N | W-C≡O bend  | Au  | T2g |
| 101 | 485.31  | 0.00   | Y | W-C≡O bend  | B3g | T2g |
| 102 | 485.87  | 0.00   | N | W-C≡O bend  | B3u | T2g |
| 103 | 486.27  | 0.00   | Y | W-C≡O bend  | Ag  | T2g |
| 104 | 486.46  | 0.00   | Y | W-C≡O bend  | B2g | T2g |
| 105 | 488.43  | 0.00   | Y | W-C≡O bend  | Ag  | T2g |
| 106 | 489.02  | 0.00   | N | W-C≡O bend  | B1u | T2g |
| 107 | 490.00  | 0.00   | Y | W-C≡O bend  | B2g | T2g |
| 108 | 490.86  | 0.04   | N | W-C≡O bend  | B3u | T2g |
| 109 | 531.10  | 0.00   | N | W-C≡O bend  | Au  | T2u |
| 110 | 531.23  | 0.07   | N | W-C≡O bend  | B1u | T2u |
| 111 | 531.28  | 0.01   | N | W-C≡O bend  | B2u | T2u |
| 112 | 531.85  | 0.00   | Y | W-C≡O bend  | B3g | T2u |
| 113 | 531.91  | 0.00   | Y | W-C≡O bend  | B2g | T2u |
| 114 | 532.28  | 0.00   | N | W-C≡O bend  | Au  | T2u |
| 115 | 532.37  | 0.00   | Y | W-C≡O bend  | B1g | T2u |
| 116 | 533.31  | 0.00   | Y | W-C≡O bend  | B1g | T2u |
| 117 | 533.35  | 0.00   | N | W-C≡O bend  | B3u | T2u |
| 118 | 534.04  | 0.00   | Y | W-C≡O bend  | B3g | T2u |
| 119 | 534.27  | 0.00   | Y | W-C≡O bend  | Ag  | T2u |
| 120 | 534.53  | 0.11   | N | W-C≡O bend  | B2u | T2u |
| 121 | 591.02  | 20.36  | N | W-C stretch | B1u | T1u |
| 122 | 591.69  | 0.00   | Y | W-C stretch | Ag  | T1u |
| 123 | 591.90  | 12.32  | N | W-C stretch | B3u | T1u |
| 124 | 592.32  | 20.79  | N | W-C stretch | B2u | T1u |
| 125 | 592.62  | 0.00   | Y | W-C stretch | B2g | T1u |
| 126 | 593.82  | 8.31   | N | W-C stretch | B3u | T1u |
| 127 | 594.21  | 0.00   | Y | W-C stretch | Ag  | T1u |
| 128 | 597.03  | 0.00   | N | W-C stretch | Au  | T1u |
| 129 | 598.00  | 0.00   | Y | W-C stretch | B3g | T1u |
| 130 | 604.19  | 0.00   | Y | W-C stretch | B2g | T1u |
| 131 | 604.30  | 0.31   | N | W-C stretch | B1u | T1u |
| 132 | 604.71  | 0.00   | Y | W-C stretch | B1g | T1u |
| 133 | 1829.65 | 287.60 | N | C≡O stretch | B3u | Eg  |
| 134 | 1830.78 | 0.00   | Y | C≡O stretch | Ag  | Eg  |
| 135 | 1831.38 | 0.00   | Y | C≡O stretch | B2g | Eg  |
| 136 | 1831.71 | 377.29 | N | C≡O stretch | B1u | Eg  |
| 137 | 1834.00 | 381.75 | N | C≡O stretch | B2u | Eg  |
| 138 | 1841.32 | 0.00   | N | C≡O stretch | Au  | Eg  |
| 139 | 1845.26 | 0.00   | Y | C≡O stretch | Ag  | T1u |
| 140 | 1846.05 | 0.00   | Y | C≡O stretch | B3g | Eg  |
| 141 | 1851.23 | 82.29  | N | C≡O stretch | B3u | T1u |
| 142 | 1882.51 | 0.00   | Y | C≡O stretch | Ag  | T1u |
| 143 | 1883.22 | 0.00   | Y | C≡O stretch | B1g | Eg  |
| 144 | 1884.86 | 1.78   | N | C≡O stretch | B1u | T1u |
| 145 | 1887.81 | 2.27   | N | C≡O stretch | B2u | T1u |
| 146 | 1888.45 | 0.00   | Y | C≡O stretch | B2g | T1u |
| 147 | 1889.86 | 0.58   | N | C≡O stretch | B3u | T1u |
| 148 | 1897.69 | 0.00   | Y | C≡O stretch | B2g | T1u |
| 149 | 1900.79 | 0.44   | N | C≡O stretch | B1u | T1u |
| 150 | 1903.32 | 0.00   | Y | C≡O stretch | B3g | T1u |

|     |         |      |   |             |     |     |
|-----|---------|------|---|-------------|-----|-----|
| 151 | 1908.42 | 0.00 | N | C≡O stretch | Au  | T1u |
| 152 | 1911.75 | 0.00 | Y | C≡O stretch | B1g | T1u |
| 153 | 1999.27 | 0.00 | Y | C≡O stretch | Ag  | A1g |
| 154 | 2000.40 | 0.11 | N | C≡O stretch | B1u | A1g |
| 155 | 2000.48 | 0.00 | Y | C≡O stretch | B2g | A1g |
| 156 | 2000.87 | 0.03 | N | C≡O stretch | B3u | A1g |
